# Supplementary material for: Upstream Regulator Analysis of Wooden Breast Myopathy Proteomics in Commercial Broilers and Comparison to Feed Efficiency Proteomics in Pedigree Male Broilers
Source: PubMed Central journal article supplement (PMC7825620; doi:10.3390/foods10010104), 2021-01-06
Supplement: foods-10-00104-s001.pdf [file foods-10-00104-s001.pdf]

**Supplementary Table S1.**

Abbreviations and names with P value and fold change of proteins presented in Tables 2 and 3 listed alphabetically. Fold Differences in green (negative values) were down-regulated in wooden breast (WB) myopathy whereas fold differences in red (positive values) were up-regulated in WB myopathy breast muscle relative to values expressed in normal breast muscle tissue.

| Symbol        | Entrez Gene Name                                          | P-value | Fold Change |
|---------------|-----------------------------------------------------------|---------|-------------|
| ABCB6         | ATP binding cassette subfamily B member 6                 | 0.003   | -1.78       |
| ACP1          | acid phosphatase 1                                        | 0.031   | -1.20       |
| AK1           | adenylate kinase 1                                        | 0.005   | -1.76       |
| ALDOC         | aldolase, fructose-bisphosphate C                         | 0.009   | -1.43       |
| ANXA2         | annexin A2                                                | 0.017   | 1.95        |
| ARF1          | ADP ribosylation factor 1                                 | 0.015   | 1.46        |
| C3            | complement C3                                             | 0.016   | 1.75        |
| CALR          | Calreticulin                                              | 0.014   | 1.60        |
| CAPNS1        | calpain small subunit 1                                   | 0.034   | -1.20       |
| CBR1          | carbonyl reductase 1                                      | 0.027   | -1.33       |
| CDH13         | cadherin 13                                               | 0.024   | 1.54        |
| COL7A1        | collagen type VII alpha 1 chain                           | 0.002   | -1.29       |
| CRYAB         | crystallin alpha B                                        | 0.049   | 1.72        |
| CS            | citrate synthase                                          | 0.048   | -1.20       |
| CTSB          | cathepsin B                                               | 0.051   | 1.82        |
| DDX3X         | DEAD-box helicase 3 X-linked                              | 0.006   | 1.31        |
| DES           | Desmin                                                    | 0.005   | 16.10       |
| DSTN          | destrin, actin depolymerizing factor                      | 0.001   | 1.80        |
| DYNC1H1       | dynein cytoplasmic 1 heavy chain 1                        | 0.019   | 1.33        |
| EEF1A1        | eukaryotic translation elongation factor 1 alpha 1        | 0.000   | 2.68        |
| EIF3L         | eukaryotic translation initiation factor 3 subunit L      | 0.042   | 1.50        |
| FDPS          | farnesyl diphosphate synthase                             | 0.032   | -1.53       |
| FGA           | fibrinogen alpha chain                                    | 0.008   | 1.45        |
| FLNA          | filamin A                                                 | 0.041   | 2.12        |
| FSCN1         | fascin actin-bundling protein 1                           | 0.047   | 2.67        |
| GAPDH         | glyceraldehyde-3-phosphate dehydrogenase                  | 0.033   | -1.47       |
|               | glutamine amidotransferase like class 1 domain containing |         |             |
| GATD3A/GATD3B | 3A                                                        | 0.001   | -1.84       |
| GLO1          | glyoxalase I                                              | 0.032   | -1.61       |
| GOT1          | glutamic-oxaloacetic transaminase 1                       | 0.004   | -1.49       |
| GOT2          | glutamic-oxaloacetic transaminase 2                       | 0.019   | -1.37       |
| GPD1          | glycerol-3-phosphate dehydrogenase 1                      | 0.039   | -1.73       |
| HINT1         | histidine triad nucleotide binding protein 1              | 0.017   | -2.14       |
| HK1           | hexokinase 1                                              | 0.028   | 1.59        |
| HNRNPH1       | heterogeneous nuclear ribonucleoprotein H1                | 0.045   | 1.25        |
| HSP90AA1      | heat shock protein 90 alpha family class A member 1       | 0.000   | 1.18        |

|         |                                               |       |       |
|---------|-----------------------------------------------|-------|-------|
| HSP90B1 | heat shock protein 90 beta family member 1    | 0.003 | 1.55  |
| HSPA2   | heat shock protein family A (Hsp70) member 2  | 0.035 | 1.31  |
| HSPA5   | heat shock protein family A (Hsp70) member 5  | 0.002 | 1.38  |
| IARS1   | isoleucyl-tRNA synthetase 1                   | 0.039 | 1.21  |
| IGHM    | immunoglobulin heavy constant mu              | 0.028 | 1.83  |
| KLHL40  | kelch like family member 40                   | 0.017 | 2.96  |
| LDHA    | lactate dehydrogenase A                       | 0.006 | -1.96 |
| ME1     | malic enzyme 1                                | 0.028 | -1.56 |
| P4HB    | prolyl 4-hydroxylase subunit beta             | 0.006 | 1.72  |
| PARK7   | Parkinsonism associated deglycase             | 0.016 | -1.74 |
| PDCD6IP | programmed cell death 6 interacting protein   | 0.020 | 1.32  |
| PDIA3   | protein disulfide isomerase family A member 3 | 0.003 | 1.52  |
| PDIA4   | protein disulfide isomerase family A member 4 | 0.007 | 1.83  |
| PDIA6   | protein disulfide isomerase family A member 6 | 0.005 | 1.30  |
| PEBP1   | phosphatidylethanolamine binding protein 1    | 0.041 | -1.46 |
| PGAM1   | phosphoglycerate mutase 1                     | 0.022 | -1.98 |
| PGD     | phosphogluconate dehydrogenase                | 0.014 | 1.40  |
| PGK1    | phosphoglycerate kinase 1                     | 0.026 | -1.70 |
| PKM     | pyruvate kinase M1/2                          | 0.016 | -1.93 |
| PLS3    | plastin 3                                     | 0.011 | 2.73  |
| POSTN   | Periostin                                     | 0.024 | 2.36  |
| PPIA    | peptidylprolyl isomerase A                    | 0.031 | 1.52  |
| PRDX6   | peroxiredoxin 6                               | 0.044 | -1.28 |
| RAB1A   | RAB1A, member RAS oncogene family             | 0.001 | 1.44  |
| RACK1   | receptor for activated C kinase 1             | 0.015 | 2.54  |
| RAN     | RAN, member RAS oncogene family               | 0.049 | 1.20  |
| RHOA    | ras homolog family member A                   | 0.005 | 1.67  |
| RPL11   | ribosomal protein L11                         | 0.010 | 3.44  |
| RPL18   | ribosomal protein L18                         | 0.033 | 2.49  |
| RPL6    | ribosomal protein L6                          | 0.011 | 3.25  |
| RPLP0   | ribosomal protein lateral stalk subunit P0    | 0.027 | 2.58  |
| RPS11   | ribosomal protein S11                         | 0.024 | 1.83  |
| RPS14   | ribosomal protein S14                         | 0.006 | 2.37  |
| RPS2    | ribosomal protein S2                          | 0.007 | 2.54  |
| RPS24   | ribosomal protein S24                         | 0.025 | 1.85  |
| RPS3    | ribosomal protein S3                          | 0.010 | 3.46  |
| Rps3a1  | ribosomal protein S3A1                        | 0.013 | 2.91  |
| RPS7    | ribosomal protein S7                          | 0.022 | 1.86  |
| RPS8    | ribosomal protein S8                          | 0.009 | 2.33  |
| TAGLN2  | transgelin 2                                  | 0.033 | 1.52  |
| TLN1    | talin 1                                       | 0.013 | 2.85  |
| UBE2V2  | ubiquitin conjugating enzyme E2 V2            | 0.005 | -1.22 |
| VIM     | vimentin                                      | 0.010 | 3.41  |

|       |                                        |                           |                |       |      |
|-------|----------------------------------------|---------------------------|----------------|-------|------|
| YWHAE | tyrosine<br>activation protein epsilon | 3-monoxygenase/tryptophan | 5-monoxygenase | 0.010 | 1.66 |
| YWHAZ | tyrosine<br>activation protein zeta    | 3-monoxygenase/tryptophan | 5-monoxygenase | 0.010 | 1.53 |

### Supplementary Table S2

Functions predicted to be inhibited (blue) in breast muscle of Pedigree Male Broilers exhibiting a high compared to low feed efficiency phenotype (previously unpublished data from Kong et al. [11]).

| Functions          | Activation z-Score | <i>p</i> -Value of Overlap | Differentially Expressed Proteins <sup>1</sup>                                           |
|--------------------|--------------------|----------------------------|------------------------------------------------------------------------------------------|
| Necrosis of Muscle | -2.78              | $3.33 \times 10^{-7}$      | ACTC1, ATP2B4, CAMK2D, CAV1, DMD, EEF1A1, EEF1A2, GPX1, KLHL40, NUB1, PRDX3, PSMB1, SGCG |
| Cell death         | -2.60              | $1.54 \times 10^{-6}$      | ACTC1, ATP2B4, CAMK2D, CAV1, DMD, EEF1A1, EEF1A2, GPX1, KLHL40, NUB1, PRDX3, PSMB1, SOD1 |
| Apoptosis          | -2.81              | $1.29 \times 10^{-6}$      | ACTC1, ATP2B4, GPX1, KLHL40, NUB1, PRDX3, PSMB1, SOD1                                    |
